# Supplementary material for: ZBED Evolution: Repeated Utilization of DNA Transposons as Regulators of Diverse Host Functions
Source: PubMed Central journal article supplement (PMC3606216; doi:10.1371/journal.pone.0059940), 2013-03-22

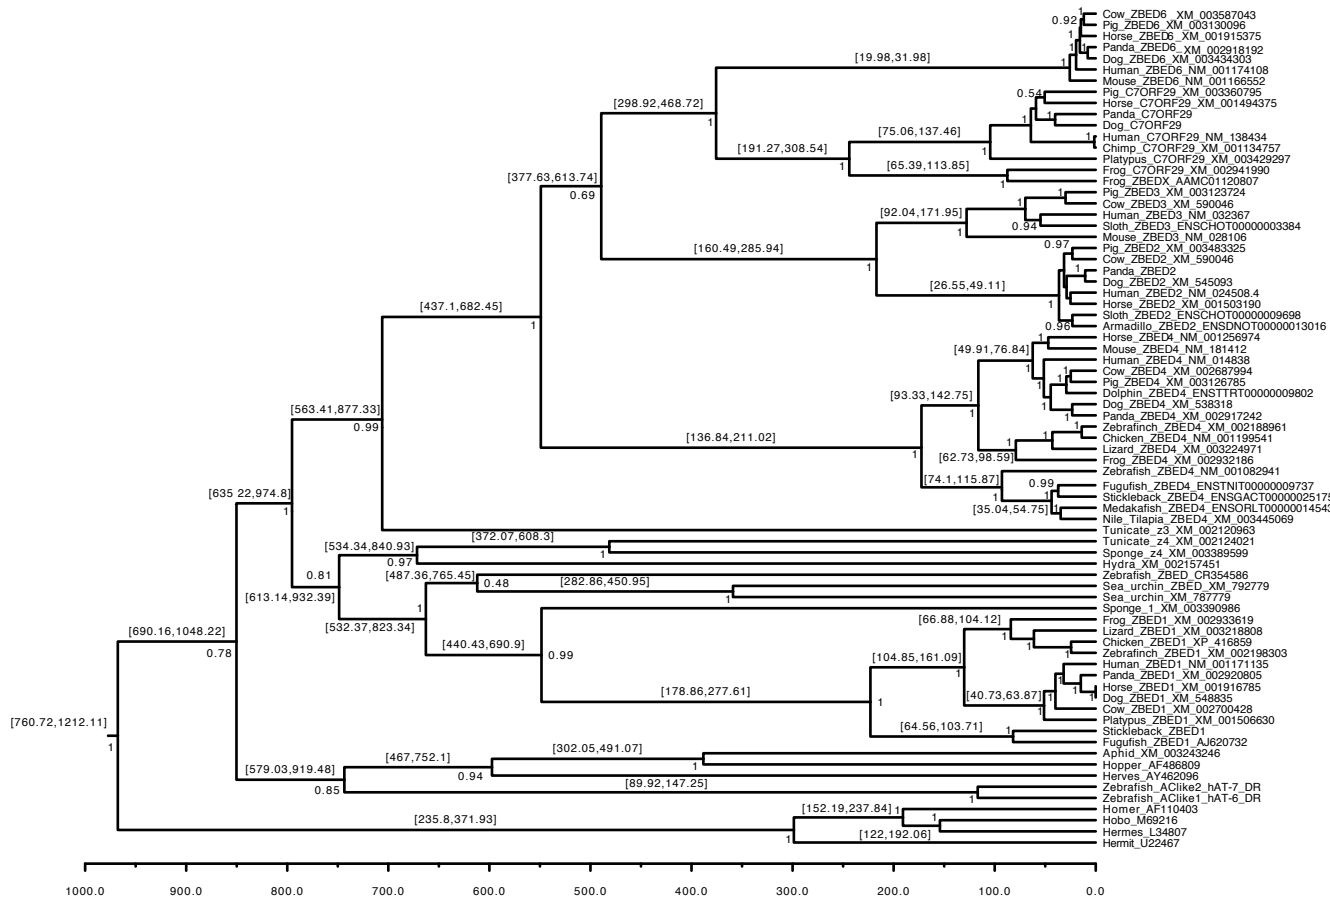

Supplement: pone.0059940.s001.pdf [file pone.0059940.s001.pdf]
